# Supplementary material for: Improving best practice for patients receiving hospital discharge letters: a realist review protocol
Source: PubMed Central journal article supplement (PMC5695342; doi:10.1136/bmjopen-2017-018353), 2017-11-12
Supplement: bmjopen-2017-018353.draft_revisions.pdf [file bmjopen-2017-018353.draft_revisions.pdf]

# BMJ Open

BMJ Open is committed to open peer review. As part of this commitment we make the peer review history of every article we publish publicly available.

When an article is published we post the peer reviewers' comments and the authors' responses online. We also post the versions of the paper that were used during peer review. These are the versions that the peer review comments apply to.

The versions of the paper that follow are the versions that were submitted during the peer review process. They are not the versions of record or the final published versions. They should not be cited or distributed as the published version of this manuscript.

BMJ Open is an open access journal and the full, final, typeset and author-corrected version of record of the manuscript is available on our site with no access controls, subscription charges or pay-per-view fees (<http://bmjopen.bmj.com>).

If you have any questions on BMJ Open's open peer review process please email [editorial.bmjopen@bmj.com](mailto:editorial.bmjopen@bmj.com)

# BMJ Open

## Improving best practice for patients receiving hospital discharge letters: a realist review protocol

|                                 |                                                                                                                                                                                                                                                                                                                                                                                      |
|---------------------------------|--------------------------------------------------------------------------------------------------------------------------------------------------------------------------------------------------------------------------------------------------------------------------------------------------------------------------------------------------------------------------------------|
| Journal:                        | <i>BMJ Open</i>                                                                                                                                                                                                                                                                                                                                                                      |
| Manuscript ID                   | bmjopen-2017-018353                                                                                                                                                                                                                                                                                                                                                                  |
| Article Type:                   | Protocol                                                                                                                                                                                                                                                                                                                                                                             |
| Date Submitted by the Author:   | 22-Jun-2017                                                                                                                                                                                                                                                                                                                                                                          |
| Complete List of Authors:       | Weetman, Katharine; University of Warwick, Health Sciences<br>Wong, Geoffrey; University of Oxford, 2. Nuffield Department of Primary Care Health Sciences<br>Scott, Emma; University of Warwick Warwick Medical School, Health Sciences<br>Schnurr, Stephanie; University of Warwick, Centre for Applied Linguistics<br>Dale, Jeremy; University of Warwick, Warwick Medical School |
| <b>Primary Subject Heading</b>: | Health services research                                                                                                                                                                                                                                                                                                                                                             |
| Secondary Subject Heading:      | Communication, General practice / Family practice, Health services research, Patient-centred medicine                                                                                                                                                                                                                                                                                |
| Keywords:                       | realist review, hospital discharge, communication, discharge letter, patient information                                                                                                                                                                                                                                                                                             |
|                                 |                                                                                                                                                                                                                                                                                                                                                                                      |

SCHOLARONE™  
Manuscripts

# Improving best practice for patients receiving hospital discharge letters: a realist review protocol

Katharine Weetman<sup>1</sup>, Geoffrey Wong<sup>2</sup>, Emma Scott<sup>3</sup>, Stephanie Schnurr<sup>4</sup>,  
Jeremy Dale<sup>5</sup>

1. Primary Care, Division of Health Sciences, Warwick Medical School, University of Warwick, Coventry, UK, CV4 7AL, **Doctoral Researcher**,
2. Nuffield Department of Primary Care Health Sciences, Medical Sciences Division, University of Oxford, Oxford, UK, OX2 6GG, **Clinical Research Fellow**,
3. Primary Care, Division of Health Sciences, Warwick Medical School, University of Warwick, Coventry, UK, CV4 7AL, **Senior Research Fellow**
4. Centre for Applied Linguistics, University of Warwick, Coventry, UK, CV4 7AL, **Associate Professor**
5. Primary Care, Division of Health Sciences, Warwick Medical School, University of Warwick, Coventry, UK, CV4 7AL, **Professor**

Correspondence to:

Katharine Weetman

Warwick Medical School, University of Warwick, Coventry, UK, CV4 7AL

K.Weetman@warwick.ac.uk

+44 (0)2476 151077

Word count, excluding title page, abstract, references, figures & tables:

3753 (limit 4,000)

**TITLE**

Improving best practice for patients receiving hospital discharge letters: a realist review protocol

**ABSTRACT****Introduction:**

Discharge documents are important for transferring information from hospitals to the referring clinician – in the UK and many countries, this is often the patient's General Practitioner or Family Physician. However, patients may or may not receive their discharge letters, and whether or not patients should routinely receive discharge letters remains unclear.

**Methods and analysis:**

The review will consolidate evidence on patients receiving discharge letters through the theory-driven approach of a realist review.

The review will be conducted systematically and seek to explain how, why, for whom and in what contexts does this practice “work”. The review will specifically explore whether there *are* benefits of this practice and if so what are the important contexts for triggering the mechanisms associated with these outcome benefits. Negative effects will also be considered.

Several steps will occur: devising initial rough programme theory, searching the evidence, selecting relevant documents, extracting data, synthesising and finally programme theory refinement. As the process is viewed as iterative, this cycle of steps may be repeated as many times as is necessary to reach *theoretical saturation* and may not be linear.

The initial programme theory will be tested and refined throughout the review process and by stakeholder involvement of NHS policy makers, practitioners and service users.

**Ethics and dissemination:**

Formal ethical review is not required. The resulting programme theory is anticipated to explain how the intervention of patients receiving written discharge communication may work in practice, for whom, and in what contexts; this will inform best practice of patients receiving discharge communication. The review findings will be disseminated in a peer-reviewed journal and presentations and discussions with relevant organisations and stakeholders. While the review will be from the perspective of the UK NHS, its findings should be relevant to other healthcare systems.

**Registration details:**

The protocol is registered with PROSPERO 2017:CRD42017069863.

### Strengths and limitations of this study:

- A realist review approach accounts for complexity which is relevant and apt for research relating to healthcare policy.
- Due to feasibility, stakeholder involvement is limited to step 6 of the review process.

## INTRODUCTION

### Background

It is a well-established practice that written *discharge communication* should take place between the discharging physician and follow-up physician, typically the patient's General Practitioner (GP) or Family Physician (1). This is particularly important in healthcare systems in which primary care services are well established, such as in the UK. "Discharge communication" may follow inpatient or outpatient discharge and typically comprises a discharge letter or summary. Sometimes the patient may also receive written discharge communication but in the UK this is not standardised.

In 2003, the Department of Health (DH) in England released 'good practice guidelines' recommending that National Health Service (NHS) patients should be copied into their letters where appropriate (2). This was intended to increase patient understanding, the quality of information sent, and improve doctor-patient relationships (1-4). However, the evidence of how patients feel about this and moreover whether this practice *is* beneficial and, if so, *when*, *how* and *for whom* remains limited (see (4-6)).

Evidence from the UK and other settings indicates that patients receiving medical letters can be beneficial (4-15), with outcomes including: increased understanding (6), increased patient satisfaction (8), reduced readmissions (15), and increased patient involvement in their care (9). There is also high reported preference by patients for receiving letters (94% where n=63 (6), 95% where n=500 (5)). However, there are UK studies (7, 10, 16, 17) and non-UK studies (18, 19) which suggest "detriments" or concerns with patients receiving letters, including: concerns over confidentiality (7, 17), potential patient distress with letter content (7), associated financial costs to the NHS (7, 17), issues around the comprehensibility of medical letters (16, 17, 19), and failing to acknowledge the voice of patients who do not want to receive letters (7).

Recently there have been studies, both within (20) and outside the UK (13, 18), that move beyond simply "copying" patients into correspondence and instead writing 'patient-directed letters'. In 2014, Bench et al. (20) explored the feasibility and effects of giving patients personalised discharge summaries produced by nurses. They found the summaries helped support patients and increased patient understanding. Nonetheless, barriers were identified for implementing this intervention such as 'motivation' and 'time constraints' (20). Similarly, in 2016, Buurman et al. (18) looked at personalised patient discharge letters. Although the practice was generally rated 'positively' by patients and physicians in their research, they reported medical interns felt 'explaining medical terms in understandable plain language was a difficult task' and one which incurred a feeling of 'great responsibility' and insecurity (18).

In summary, whether or not it *is* beneficial for patients to receive written discharge communication, and, if so, *for whom*, *when*, *how*, *why*, and whether this should be a direct copy or personalised letter remains equivocal. We could find no review specific to this question; we only found reviews of copying letters in general, for example, Minhas (8) and

1  
2  
3 Harris and Boaden (12). We therefore concluded that formal consolidation of the evidence is  
4 required.

### 5 6 **Realist Review Methodology**

7  
8 A realist review may be defined as a, 'theory-driven, interpretative approach to the  
9 synthesis of evidence' (21). The evidence synthesised may be qualitative, quantitative or  
10 mixed methods (22). In line with taking a theory-driven approach, one of the main steps of a  
11 realist review, as outlined in the work of Pawson (23-25), is to develop and refine a 'middle-  
12 range' realist *programme theory* which details how an intervention or programme may be  
13 theorised to "work" as well as under what contexts, for whom, why and to what extent. Thus,  
14 this review seeks to develop a "programme theory" for patients receiving written discharge  
15 communication.

16  
17 A realist review approach views "causation" as *generative*, that is, "mechanisms" may  
18 be triggered within certain "contexts" resulting in one or more "outcomes" following an event  
19 or "intervention" (24). A realist review, therefore, is valuable to inform attempts to reproduce  
20 beneficial or positive outcomes through understanding how an intervention *works* and hence  
21 under what circumstances, the mechanisms connected to beneficial outcomes may be  
22 triggered (26). Hence, within a healthcare context a realist review can aid understanding and  
23 explanation of how the intervention may improve clinical outcomes. Another value or  
24 strength of a realist review is the capacity to account for *complexity* and non-linear causal  
25 relationships; this is particularly relevant for research on the intervention of patients receiving  
26 written discharge communication (21, 23). The intervention under scrutiny is complex in  
27 several ways: the *form* of discharge communication may vary and the success of the  
28 intervention is highly context-dependent and most likely influenced by factors such as  
29 practitioner communicative competence, patient education and understanding, and attitudes  
30 of the patient and professional.

31  
32 A realist review aims to *explain* how and why an intervention may be theorised to  
33 *work* (or not) (24). The notion of moving beyond *evaluation* of an intervention and onto  
34 *explanation* of how and why an intervention *works* is one of the key distinctions between a  
35 realist review and other traditional review types such as a systematic review; it is also one of  
36 the realist review strengths in application to healthcare and social policy (23, 27). Due to the  
37 well-documented strengths of realist reviews, it is perhaps unsurprising that realist reviews  
38 are being increasingly used within healthcare contexts (e.g. (21, 22, 28-34)). Thus, a realist  
39 approach is suitable and useful for the current research.

## 40 41 42 43 44 **METHODS AND ANALYSIS**

### 45 46 **Review Aim, Questions and Objectives**

47  
48 Aim: To understand how and why the different effects are produced from patients receiving  
49 written discharge communication

50 Effects may be simplified into desired/intended or 'positive' and undesired or 'negative'  
51 depending on whether the outcome is reported in the source as beneficial (e.g. increased  
52 patient understanding of condition) or detrimental (e.g. increased patient anxiety).

53  
54 Research questions (RQs):

55  
56 RQ1: What positive and negative effects have been reported on patients receiving written  
57 discharge communication?  
58

1  
2  
3 RQ2: What are the important contexts which determine whether the different mechanisms  
4 produce positive and negative effects, and why?

5  
6 Objectives:

- 7  
8 1. To conduct a realist review to understand how and why the different effects  
9 arise when patients receive written discharge communications.  
10 2. Develop a programme theory for patients receiving written discharge  
11 communication.  
12 3. To make recommendations for best practice for patients receiving written  
13 hospital discharge communication.  
14

15 Review start date: June 2017

16 Review anticipated completion: January 2018  
17  
18  
19

## 20 Study Design

21 The review design is based on a collation of Pawson's five review stages (24), the project  
22 protocol by Ford et al. (27), and the project diagram by Wong et al. (22). The design is  
23 summarised in *Figure 1*.  
24  
25

26 *Figure 1*  
27  
28  
29  
30  
31  
32  
33  
34  
35  
36  
37  
38  
39  
40  
41  
42  
43  
44

### 45 Step 1: Locate existing theories

46 Locating existing theories on how patients receiving written discharge communication  
47 is theorised to work or not work in different contexts will be completed through a scoping  
48 search by KW. The scoping search will be based on search terms centred on the  
49 intervention under study (e.g. patient copies/ receiving letters / discharge communication).  
50 This search will include a mix of electronic published resources (MEDLINE, Web of Science)  
51 and UK healthcare websites (Department of Health, Royal College of Physicians). Theories  
52 located in the scoping stage will be inspected and selected based on relevance to the review  
53 aims and RQs; we seek theories which aid *explanation* of how and why patients receiving  
54 discharge communication results in different positive effects (e.g. drug adherence) and  
55 negative effects (e.g. preventable hospital readmissions). Any search strategies detailed in  
56 documents found from the scoping search will be used to inform step 2. "Keywords" "Medical  
57  
58  
59  
60

Subject Headings (MeSH)” and any other indexing for the documents found will also be used to inform the step 2 searching phase. From the findings of step 1 and utilising the various expertise of the research team, an initial “rough” programme theory will be developed, to be refined throughout the realist review process.

## Step 2: Searching

Following Sholl et al. (34), the list of search terms will be first piloted and modified using Medline by KW and an information specialist. Thereafter, the modified list of search terms will be employed and adapted as required across source types. The searching phase will entail a ‘purposive’ sampling strategy utilising an iterative approach (23). In line with a realist approach, the search strategy is intended to include a diverse range of evidence for programme theory development and refinement. The search will be information-specialist led. Search terms will be guided by “keywords”, “MeSH terms”, topic indexing and any found search strategies from documents located in Step 1. We anticipate the search strategy will need further testing and modification during the searching phase.

Electronic and manual searching will take place. Material included will be sourced from electronic databases, UK healthcare sites, grey literature searching and publications and archives of collaborating and local commissioners and policy-makers (see *Table 1*). In addition, hand-searching of bibliographies, ‘cited by’ searching, and contacting experts will also be undertaken.

*Table 1*

|    | Sources to be searched                        |
|----|-----------------------------------------------|
| 1  | MEDLINE                                       |
| 2  | EMBASE                                        |
| 3  | CINAHL                                        |
| 4  | DARE                                          |
| 5  | ASSIA                                         |
| 6  | Web of Science                                |
| 7  | ZETOC                                         |
| 8  | AMED                                          |
| 9  | NHS Digital (HSCIC)                           |
| 10 | NHS Evidence (public domain only)             |
| 11 | DH                                            |
| 12 | NICE Guidelines                               |
| 13 | Cochrane database of systematic reviews       |
| 14 | EPPI-CENTRE                                   |
| 15 | SCOPUS                                        |
| 16 | Google Scholar                                |
| 17 | OpenGrey                                      |
| 18 | Greynet sources                               |
| 19 | ProQuest dissertations and theses             |
| 20 | General Medical Council                       |
| 21 | Royal College of Physicians                   |
| 22 | Local Medical Committees (West Midlands)      |
| 23 | Clinical Commissioning Groups (West Midlands) |
| 24 | SIGN                                          |



1  
2  
3 The search “threshold” will be decided according to Pawson’s ‘test of saturation’ (24,  
4 35). Consequently, after each cycle of searching the research team will determine whether  
5 the latest search has provided additional information about the intervention to answer the  
6 research questions and test the programme theory (28). As such, the stopping point for  
7 searching will be determined when ‘theoretical saturation’ is reached; when the addition of  
8 documents is not adding further knowledge (24).  
9

10 The search strategy is not intended to be fully comprehensive or exhaustive, but  
11 should provide a large enough overview of the literature and sources to be meaningful and  
12 develop and refine the programme theory (23).  
13

### 14 **Step 3: Document selection**

15 Documents will primarily be selected on their *relevance*; they must contain data that  
16 inform the programme theory (23, 24). Crucially, as explained by Brennan et al. (21), this  
17 does not mean the entirety of the document must inform the programme theory but that the  
18 selection process will ‘consider small sections of the primary study to test a very specific  
19 hypothesis about the relationships between context, mechanism and outcomes’. Assessing  
20 the relevance of documents in the selection phase will be discussed and decided among the  
21 research team. Hence, selection of documents will be grounded in whether they provide  
22 knowledge to the theory of how patients receiving discharge communication works.  
23  
24

25 Reference manager software will be used to export citations of search results. Search  
26 results will be screened and selected firstly by title, secondly by abstract and finally by the  
27 full text. Data screening and selection will be undertaken by KW with two members of the  
28 review team, who will jointly assume the role of second reviewer. KW will screen the full set  
29 of search results, while the second reviewers will each screen up to half of the items  
30 retrieved from searching. The second reviewers will screen a random test selection of 10%  
31 each; we have chosen this proportion following the review by Wong et al. (22). Reasons for  
32 all exclusions will be recorded by all reviewers. A kappa measure will be calculated and  
33 inter-reviewer disagreement ( $K < .8$ ) will result in the second reviewers each screening the  
34 remaining respective 40%. Thereafter, the reviewers will discuss their selections until  
35 document inclusion consensus is reached for the phase. This process will take place for  
36 each of the screening and selection phases: titles, abstracts and full texts. The wider  
37 research team will adjudicate contested document selections if necessary.  
38  
39

40 The preliminary inclusion and exclusion criteria below will be applied by reviewers to  
41 all sources. As with all other steps in the realist review, screening and document selection  
42 will be viewed as an iterative process and so inclusion and exclusion criteria may change  
43 and develop (28). The review intends to source quantitative, qualitative and mixed methods  
44 evidence. For the purposes of this review, the intervention ‘patients receiving written  
45 discharge communication’ will be defined as the patient being given or sent any form of  
46 written paper or hard-copy hospital discharge communication or such communication being  
47 made available digitally; this may be a direct copy (cc:[PATIENT]), a patient-directed letter,  
48 or a combination of the two.  
49

50 Inclusion criteria:

- 51
- 52
- 53 • Meet “relevance” criteria (23, 24)
- 54 • Patients discharged from hospital setting (inpatients and outpatients) to GP or family  
55 physician or community physician care
- 56 • Discharge where written correspondence, ‘discharge communication’ is sent to GP  
57 and/or not patient  
58  
59

- Document/journal article/source written in English

Exclusion criteria:

- Discharge communications to units or physicians other than General Practitioners or family or community physicians e.g. another hospital
- Discharge of patients with conditions who lack cognitive capacity e.g. dementia, as their communicative needs are specialised
- Discharge where no written communication took place e.g. telephone only
- Patients <18 years
- Discharge letters or summaries which are not in English or where the document details the patient required assistance reading their letter e.g. translation by a relative

The preliminary criteria have been developed in order that the resultant programme theory may encompass a variety of discharge types and be relevant across hospitals and specialities for a range of patients. However, the exclusion criteria inflicts limitations on the review. Patients who may have particularly specialised communicative needs (e.g. children) or where the intervention may have a higher risk of causing harm (e.g. psychiatric discharge documents, dementia discharge documents) have been excluded; the communication needs of these patients may be more complex and variable within and between different patient groups and therefore is not possible within the review scope.

International evidence which meets the criteria will be considered. Consequently, data extraction and synthesis will carefully examine documents according to their geographical and healthcare system context.

The document selection process will be recorded with an adapted PRISMA flow diagram to provide a clear audit trail (36).

#### **Step 4: Data extraction**

Data extraction of the selected documents will be undertaken by KW and the two additional reviewers. Realist review methodology primarily achieves data extraction through annotation and note-taking methods rather than finite or fixed data extraction forms (21, 23, 34). Comparably to Mills et al. (37) and Wiese et al. (38), we propose a hybrid approach to data extraction; characteristics of the documents will be recorded in a data extraction form in Excel and annotation of the full texts for programme theory ideas and subsequent labelling will be undertaken manually. The hybrid approach is useful in providing descriptive information for grouping documents during synthesis whilst still grounding data extraction in commonly used realist note-taking techniques (23, 24).

The data extraction form will record: basic information (authors, year of publication, ID or reference, source type, and where and/or how the document was sourced), document context (geographical location, healthcare system details), document details (aims, design, methods, setting, findings and conclusion), intervention details (type of intervention or programme e.g. direct patient copy of discharge letter, number of participants, clinical speciality, participant details, form of discharge communication (e.g. discharge summary), who was involved in intervention process). We anticipate not all of the above details will be recordable for each document; we aim to record pertinent document characteristics. Data extraction forms will first be piloted and refined as needed. Completed data extraction forms will be discussed and checked with the research team for accuracy; adjustments to the form may be made.

The annotation phase and note-taking methods will be guided by the rough programme theory developed in step 1; we will test and refine the theory using data from

1  
2  
3 included documents (37). The three members of the research team will manually review,  
4 examine, highlight and annotate the documents in relation to CMO (Context Mechanism  
5 Outcome) information and any theories about how the intervention does or does not work. In  
6 line with the work of Pawson et al. (23), documents will be 'scrutinised for which programme  
7 idea they address' and labelled. Annotations will be consolidated and discussed amongst the  
8 three annotators and wider research team.  
9

10 During the data extraction phase, documents will also be quality appraised for  
11 Pawson's concept of *rigour* (23). Brennan et al. (21) describe *rigour* as 'whether the methods  
12 used to generate the relevant data are credible and trustworthy'. Rigour will be assessed in  
13 accordance with 'Realist and Meta-Review Evidence Synthesis: Evolving Standards'  
14 (RAMESES) guidelines and standards (39, 40). It is important to note that although we will  
15 assess "rigour", Pawson et al. (23) advise against exclusion of an entire document *solely*  
16 based on rigour; they argue this could, 'reduce rather than increase the validity and  
17 generalisability of review findings' as different parts of different documents contribute to the  
18 evidence base for programme theory testing and refinement. Hence, we will only make  
19 judgement about the rigour of data that we have assessed to be relevant for programme  
20 theory development and testing (23).  
21  
22

### 23 **Step 5: Data synthesis**

24 Data and analysis from step 4 will be consolidated and synthesised to refine the  
25 programme theory by KW and the wider research team. A realist analytic approach will be  
26 used to interrogate the theory, according to Pawson et al. (24), and assess, according to the  
27 data, what "works", why, for whom, to what extent and in what circumstances. Specifically,  
28 during data synthesis, we will look at evidence of the different outcomes within the initial  
29 programme theory and infer how these are caused in certain contexts through triggering  
30 different mechanisms (21, 23). We will be using the framework for synthesising evidence  
31 termed by Pawson et al. (23) as "synthesis to consider the same theory in comparative  
32 settings". They explain, 'this approach to synthesis assumes that particular programme  
33 theories work in some settings and not others and aims to make sense of the patterns of  
34 winners and losers.' We assume that the theory of patients receiving discharge  
35 communication does work in particular settings in particular forms but not in others and  
36 therefore that there may be different effects this intervention has depending on context.  
37 Hence, this approach is advantageous through comparing the intervention in the various  
38 settings found within the included documents. Our "hybrid" approach to data extraction will  
39 aid the comparative process through permitting rapid 'groupings' of intervention settings  
40 alongside the programme theory annotations and labelling from step 4.  
41  
42  
43

44 Relevant data from each document will be systematically considered to test and refine  
45 the programme theory using the following analytical strategies (21, 38, 39):  
46

- 47 • Juxtaposition of data sources – align sources and use evidence of each to build upon  
48 and clarify each other
- 49 • Reconciliation of data discrepancies – examine and explore reasons for apparent  
50 disparities between data
- 51 • Adjudication of data - quality consideration on the foundation of methodological  
52 strengths and weaknesses
- 53 • Consolidation of data - inference of Mechanisms for outcomes
- 54 • Situation of evidence - consideration of details of settings in order to complete  
55 "context" element of CMOs and explain differing outcomes of intervention  
56  
57  
58  
59  
60

To address the research questions, we will cross-tabulate and compare the CMOs in order to highlight patterns of the important contexts for positive and negative effects and any reported benefits of the intervention. CMOs will be consolidated through the process of cross-tabulation and subsequently integrated into the programme theory.

The research team is made up of healthcare researchers, practising healthcare professionals, social scientists and medical students; this range of expertise is expected to facilitate and promote rigorous analysis and synthesis of data.

### **Step 6: Refine programme theory**

The final stage is the refinement and testing of the programme theory in light of the synthesised data (23). Stakeholder perspectives will assist refinement of the final theory through providing 'content expertise' (22). Brennan et al. (21) describe stakeholder contributions as a 'reality check' to test whether the programme theory derived from the published literature aligns with stakeholder experiences in practice. Stakeholders will primarily be engaged through the project collaborating Clinical Commissioning Groups (CCGs for South Warwickshire and Coventry & Rugby) and West Midlands Clinical Research Network. We will limit stakeholder involvement to three different groups: policy and decision-makers, practitioners and service users. These will be included due to their differing perspectives on the discharge communication process.

We aim to hold three discussion groups; one for each stakeholder-type. KW will lead the discussion sessions with a research assistant. During these sessions, stakeholders will be able to view the results and analyses of the review with the opportunity to influence interpretation of findings and refine analyses; the sessions will particularly focus on discussing and refining the programme theory. It is pertinent to consult stakeholders to increase the relevance and practicability of the review recommendations for informing best practice. Formal ethical approval will not be required but informed participation will be sought.

After completion of step 6, any or all of the review steps may be revisited as necessary to refine the programme theory and attain theoretical saturation.

A diagram will be used to present the final programme theory alongside a narrative summary. The review will be reported according to RAMESES standards (39, 40).

## **ETHICS AND DISSEMINATION**

### **Ethics**

Formal ethical approval is not required for this review.

### **Dissemination**

The final theory will contribute towards explanation of what works in relation to patients receiving discharge communication. The findings will provide valuable insight into how and why this intervention produces its different effects which will support improved practice guidelines and policy. Informing best practice is of benefit to multiple stakeholders involved in sending and receiving discharge communication and development and regulation of this intervention. The review findings will be disseminated in a peer-reviewed journal, conference presentations and discussions with policymakers, educationalists and commissioners, and relevant organisations to ensure the findings are readily available to inform best practice of patients receiving their hospital discharge letters. While the review will

1  
2  
3 be undertaken from the perspective of UK NHS, its findings should be relevant to other  
4 healthcare systems in which there are well-developed primary care services.

5  
6 **Authors' contributions:**

7 KW, ES, SS and JD conceptualised the study. KW is responsible for the design and drafting  
8 of the protocol manuscript. GW, ES, SS and JD contributed to protocol development and  
9 GW also provided methodological advice. GW, JD, ES and SS critically reviewed and edited  
10 the manuscript. All authors read and approved the final manuscript.

11  
12 **Acknowledgements:** Samantha Johnson, our information specialist, for critically appraising  
13 the search strategy.

14  
15  
16 **Funding statement:** This work is supported by the Economic and Social Research Council  
17 (ESRC) grant number ES/J500203/1 and Clinical Commissioning Groups (CCGs) of  
18 Coventry & Rugby and South Warwickshire. Funding for the open access charges for  
19 publication of this protocol was provided by the RCUK fund.

20  
21 **Competing interests:** None known

22  
23  
24 **References**

- 25  
26 1. NHS England. Standards for the communication of patient diagnostic test results on  
27 discharge from hospital. [Online].; 2016. [http://www.england.nhs.uk/patientsafety/wp-](http://www.england.nhs.uk/patientsafety/wp-content/uploads/sites/32/2016/09/discharge-standards-march-16.pdf)  
28 [content/uploads/sites/32/2016/09/discharge-standards-march-16.pdf](http://www.england.nhs.uk/patientsafety/wp-content/uploads/sites/32/2016/09/discharge-standards-march-16.pdf). (accessed January  
29 2017)
- 30  
31 2. Department of Health. Copying letters to patients: good practice guidelines.; 2003.  
32 <http://webarchive.nationalarchives.gov.uk/>. (accessed 9 May 2017)
- 33  
34 3. Department of Health. The NHS Plan.; 2000. [http://webarchive.nationalarchives.gov.uk](http://webarchive.nationalarchives.gov.uk/).  
35 (accessed 2 June 2017)
- 36  
37 4. White P. Copying referral letters to patients: prepare for change. *Patient Educ Couns*.  
38 2004; 54(2): p. 159-61.
- 39  
40 5. Pothier D, Nakivell P, Hall C. What do patients think about being copied into their GP  
41 letters. *Ann R Coll Surg Engl*. 2007; 89(7).
- 42  
43 6. O'Driscoll BR, Koch J, Paschalides C. Copying letters to patients: most patients want  
44 copies of letters from outpatient clinics and find them useful. *BMJ*. 2003; 327(7412):  
45 p.451.
- 46  
47 7. Marzanski M, Musunuri P, Coupe T. Copying letters to patients: a study of patients'  
48 views'. *The Psychiatrist*. 2005; 29(2).
- 49  
50 8. Minhas R. Does copying clinical or sharing correspondence to patients result in better  
51 care? *Int J Clin Pract*. 2007; 61(8): p. 1390-5.
- 52  
53 9. Shee C. Try it and see. *BMJ*. 2008; 337: a2786
- 54  
55 10. Thornber M. Copy them in. *BMJ*. 2010; 337(1).[rapid response]  
56 <http://www.bmj.com/rapid-response/2011/11/03/simple-and-effective-communication->  
57  
58  
59  
60



1  
2  
3 skill. (accessed 31/05/2017)  
4

- 5 11. Thornber M. Copying referral letters. *Br J Gen Pract.* 2009; 59(568).  
6  
7 12. Harris C, Boaden R. Does copying clinical or sharing correspondence to. *Journal of*  
8 *Health Services Research Policy.* 2006; 11(3): p. 133-40.  
9  
10 13. Lin R, Gallagher R, Spinaze M, et al. Effect of a patient-directed discharge letter on  
11 patient understanding of their hospitalisation. *Intern Med J.* 2014; 44(9).  
12  
13 14. Santana MJ, Holroyd-Leduc J, Flemons WW, et al. The seamless transfer of care: a pilot  
14 study assessing the usability of an electronic transfer of care communication tool. *Am J*  
15 *Med Qual.* 2014; 29(6).  
16  
17 15. VanSuch M, Naessens JM, Stroebel RJ, et al. Effect of discharge instructions on  
18 readmission of hospitalised patients with heart failure: do all of the Joint Commission on  
19 Accreditation of Healthcare Organizations heart failure core measures reflect better  
20 care? *Qual Saf Health Care.* 2006; 15(6).  
21  
22 16. Main J. Copying in or copping out? *BMJ.* 2008; 337(a2688).  
23  
24 17. McKinstry B. Copying patients in is not as simple as it seems. *BMJ.* 2008; 337(a2324).  
25  
26 18. Buurman BM, Verhaegh KJ, Smeulders M, et al. Improving handoff communication from  
27 hospital to home: the development, implementation and evaluation of a personalized  
28 patient discharge letter. *Int J Qual Health Care.* 2016; 28(3).  
29  
30 19. Choudhry AJ, Baghdadi YM, Wagie AE, et al. Readability of discharge summaries: with  
31 what level of information are we dismissing our patients? *Am J Surg.* 2016; 211(3).  
32  
33 20. Bench SD, Heelas K, White C, et al. Providing critical care patients with a personalised  
34 discharge summary: a questionnaire survey and retrospective analysis exploring  
35 feasibility and effectiveness. *Intensive Crit Care Nurs.* 2014; 30(2): p. 69-76.  
36  
37 21. Brennan N, Bryce M, Pearson M, et al. Understanding how appraisal of doctors  
38 produces its effects: a realist review protocol. *BMJ Open.* 2014; 4(6).  
39  
40 22. Wong G, Brennan N, Mattick K, et al. Interventions to improve antimicrobial prescribing  
41 of doctors in training: the IMPACT (IMProving Antimicrobial presCribing of doctors in  
42 Training) realist review. *BMJ Open.* 2015; 5(10).  
43  
44 23. Pawson R, Greenhalgh T, Harvey G, et al. Realist synthesis: an introduction.: University  
45 of Manchester; 2004. <https://goo.gl/1Rz2Ry>. (accessed 4 January 2017)  
46  
47 24. Pawson R, Greenhalgh T, Harvey G, et al. Realist review-a new method of systematic  
48 review designed for complex policy interventions. *J Health Serv Res Policy.* 2005; 10(1):  
49 p. 21-34.  
50  
51 25. Pawson R. Middle Range Theory and Programme Theory Evaluation: From Provenance  
52 to Practice. In: Vaessen J, Leeuw F, eds. *Mind the Gap: perspectives on policy*  
53 *evaluation and the social sciences.* London: New Brunswick; 2010. p. 171-202.  
54  
55 26. Rycroft-Malone J, Burton C, Hall B, et al. Improving skills and care standards in the  
56  
57  
58  
59  
60

- 1  
2  
3 support workforce for older people: a realist review. *BMJ Open*. 2014; 4(5).  
4  
5 27. Ford JA, Jones AP, Wong G, et al. Improving access to high-quality primary care for  
6 socioeconomically disadvantaged older people in rural areas: a mixed method study  
7 protocol. *BMJ Open*. 2015; 5(9).  
8  
9 28. Kastner M, Estey E, Perrier L, et al. Understanding the relationship between the  
10 perceived characteristics of clinical practice guidelines and their uptake: protocol for a  
11 realist review. *Implement Sci*. 2011; 6(1): p. 69.  
12  
13 29. Pearson M, Chilton R, Woods H, et al. Implementing health promotion programmes in  
14 schools: a realist systematic review of research and experience in the United Kingdom.  
15 *Implement Sci*. 2015; 10(149).  
16  
17 30. Greenhalgh J, Gooding K, Gibbons E, et al. For whom and in what circumstances does  
18 the use of patient reported outcome measures (PROMs) improve patient care? A realist  
19 synthesis. *J Epidemiol Community Health*. 2016; 70(1).  
20  
21 31. Wong G. The Internet in Medical Education: A Worked Example of a Realist Review. In  
22 Hannes K, Lockwood C, editors. *Synthesizing Qualitative Research: Choosing the Right*  
23 *Approach*.; 2012. p. 83-112.  
24  
25 32. Harris J, Graue M, Dunning T, et al. Involving people with diabetes in the wider  
26 community in diabetes research: a realist review protocol. *Systematic Reviews*. 2015;  
27 4(146).  
28  
29 33. Husk K, Blockley K, Lovell R, et al. What approaches to social prescribing work, for  
30 whom, and in what circumstances? A protocol for a realist review. *Syst Rev*. 2016;  
31 5(93).  
32  
33 34. Sholl S, Ajjawi R, Allbutt H, et al. Balancing student/trainee learning with the delivery of  
34 patient care in the healthcare workplace: a protocol for realist synthesis. *BMJ Open*.  
35 2016; 6(4).  
36  
37 35. Pawson R. Digging for Nuggets: How 'Bad' Research Can Yield 'Good' Evidence - in -  
38 International Journal of Social Research Methodology. *Int J Soc Res Methodol*. 2006;  
39 9(2): p. 127-42.  
40  
41 36. Moher D, Liberati A, Tetzlaff J, et al. Preferred reporting items for systematic reviews and  
42 meta-analyses: the PRISMA statement. *BMJ*. 2009; 339(b2535).  
43  
44 37. Mills SL, Pumarino J, Clark N, et al. Understanding how self-management interventions  
45 work for disadvantaged populations living with chronic conditions: protocol for a realist  
46 synthesis. *BMJ Open*. 2014; 4(7): p. e005822.  
47  
48 38. Wiese A, Kilty C, Bergin C, et al. Protocol for a realist review of workplace learning in  
49 postgraduate medical education and training. *Syst Rev*. 2017; 6(10).  
50  
51 39. RAMESES. [Online].; 2013. <http://www.ramesesproject.org/>. (accessed 9 January 2017)  
52  
53 40. Wong G, Greenhalgh T, Westhorp G, et al. RAMESES publication standards: realist  
54 syntheses. *BMC Med*. 2013 January; 11(21).  
55  
56  
57  
58  
59  
60

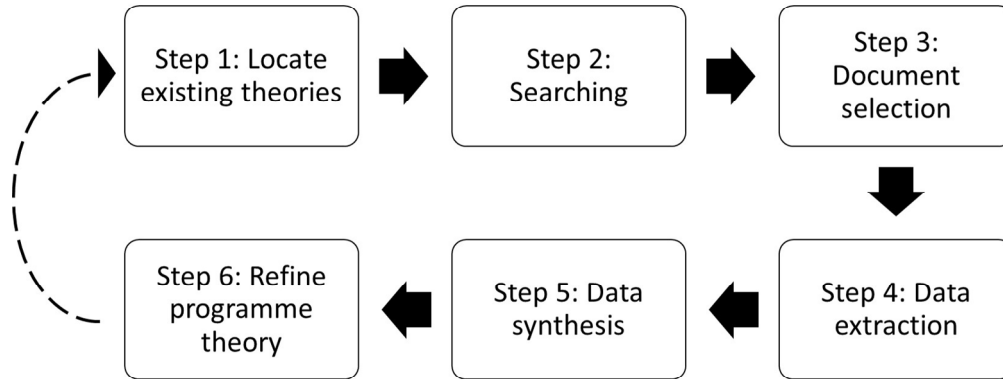

Figure 1

279x154mm (150 x 150 DPI)

review only



# BMJ Open

## Improving best practice for patients receiving hospital discharge letters: a realist review protocol

|                                 |                                                                                                                                                                                                                                                                                                                                                                                      |
|---------------------------------|--------------------------------------------------------------------------------------------------------------------------------------------------------------------------------------------------------------------------------------------------------------------------------------------------------------------------------------------------------------------------------------|
| Journal:                        | <i>BMJ Open</i>                                                                                                                                                                                                                                                                                                                                                                      |
| Manuscript ID                   | bmjopen-2017-018353.R1                                                                                                                                                                                                                                                                                                                                                               |
| Article Type:                   | Protocol                                                                                                                                                                                                                                                                                                                                                                             |
| Date Submitted by the Author:   | 21-Sep-2017                                                                                                                                                                                                                                                                                                                                                                          |
| Complete List of Authors:       | Weetman, Katharine; University of Warwick, Health Sciences<br>Wong, Geoffrey; University of Oxford, 2. Nuffield Department of Primary Care Health Sciences<br>Scott, Emma; University of Warwick Warwick Medical School, Health Sciences<br>Schnurr, Stephanie; University of Warwick, Centre for Applied Linguistics<br>Dale, Jeremy; University of Warwick, Warwick Medical School |
| <b>Primary Subject Heading</b>: | Health services research                                                                                                                                                                                                                                                                                                                                                             |
| Secondary Subject Heading:      | Communication, General practice / Family practice, Health services research, Patient-centred medicine                                                                                                                                                                                                                                                                                |
| Keywords:                       | realist review, hospital discharge, communication, discharge letter, patient information                                                                                                                                                                                                                                                                                             |
|                                 |                                                                                                                                                                                                                                                                                                                                                                                      |

SCHOLARONE™  
Manuscripts

# Improving best practice for patients receiving hospital discharge letters: a realist review protocol

Katharine Weetman<sup>1</sup>, Geoffrey Wong<sup>2</sup>, Emma Scott<sup>3</sup>, Stephanie Schnurr<sup>4</sup>,  
Jeremy Dale<sup>5</sup>

1. Primary Care, Division of Health Sciences, Warwick Medical School, University of Warwick, Coventry, UK, CV4 7AL, **Doctoral Researcher**,
2. Nuffield Department of Primary Care Health Sciences, Medical Sciences Division, University of Oxford, Oxford, UK, OX2 6GG, **Clinical Research Fellow**,
3. Primary Care, Division of Health Sciences, Warwick Medical School, University of Warwick, Coventry, UK, CV4 7AL, **Senior Research Fellow**
4. Centre for Applied Linguistics, University of Warwick, Coventry, UK, CV4 7AL, **Associate Professor**
5. Primary Care, Division of Health Sciences, Warwick Medical School, University of Warwick, Coventry, UK, CV4 7AL, **Professor**

Correspondence to:

Katharine Weetman

Warwick Medical School, University of Warwick, Coventry, UK, CV4 7AL

[K.Weetman@warwick.ac.uk](mailto:K.Weetman@warwick.ac.uk)

+44 (0)2476 151077

Word count, excluding title page, abstract, references, figures & tables:

3753 (limit 4,000)

**TITLE**

Improving best practice for patients receiving hospital discharge letters: a realist review protocol

**ABSTRACT****Introduction:**

Discharge documents are important for transferring information from hospitals to the referring clinician – in the UK and many countries, this is often the patient's General Practitioner or Family Physician. However, patients may or may not receive their discharge letters, and whether or not patients should routinely receive discharge letters remains unclear.

**Methods and analysis:**

The review will consolidate evidence on patients receiving discharge letters through the theory-driven approach of a realist review.

The review will be conducted systematically and seek to explain how, why, for whom and in what contexts does this practice “work”. The review will specifically explore whether there *are* benefits of this practice and if so what are the important contexts for triggering the mechanisms associated with these outcome benefits. Negative effects will also be considered.

Several steps will occur: devising initial rough programme theory, searching the evidence, selecting relevant documents, extracting data, synthesising and finally programme theory refinement. As the process is viewed as iterative, this cycle of steps may be repeated as many times as is necessary to reach *theoretical saturation* and may not be linear.

The initial programme theory will be tested and refined throughout the review process and by stakeholder involvement of NHS policy makers, practitioners and service users.

**Ethics and dissemination:**

Formal ethical review is not required. The resulting programme theory is anticipated to explain how the intervention of patients receiving written discharge communication may work in practice, for whom, and in what contexts; this will inform best practice of patients receiving discharge communication. The review findings will be disseminated in a peer-reviewed journal and presentations and discussions with relevant organisations and stakeholders. While the review will be from the perspective of the UK NHS, its findings should be relevant to other healthcare systems.

**Registration details:**

The protocol is registered with PROSPERO 2017:CRD42017069863.

### Strengths and limitations of this study:

- This is the first study to review and develop theories about patients receiving written discharge communication.
- A realist review approach accounts for complexity which is relevant and apt for research relating to improving healthcare policy, a complex process.
- The engagement of patients, GPs and policy makers in refining the programme theory will ensure its relevance to different stakeholder perspectives.
- Given limited study resources, wider stakeholder involvement is not feasible.
- Only studies published in the English language will be included.

## INTRODUCTION

### Background

It is a well-established practice that written *discharge communication* should take place between the discharging physician and follow-up physician, typically the patient's General Practitioner (GP) or Family Physician (1). This is particularly important in healthcare systems in which primary care services are well established, such as in the UK. "Discharge communication" may follow inpatient or outpatient discharge and typically comprises a discharge letter or summary. Sometimes the patient may also receive written discharge communication but in the UK this is not standardised.

In 2003, the Department of Health (DH) in England released 'good practice guidelines' recommending that National Health Service (NHS) patients should be copied into their letters where appropriate (2). This was intended to increase patient understanding, the quality of information sent, and improve doctor-patient relationships (1-4). However, the evidence of how patients feel about this and moreover whether this practice *is* beneficial and, if so, *when, how* and *for whom* remains limited. Evidence from the UK and other settings indicates that patients receiving medical letters can be beneficial (4-15), with outcomes including: increased understanding (6), increased patient satisfaction (8), reduced readmissions (15), and increased patient involvement in their care (9). There is also high reported preference by patients for receiving letters (94% where n=63 (6), 95% where n=500 (5)). However, there are UK studies (7, 10, 16, 17) and non-UK studies (18, 19) which suggest "detriments" or concerns with patients receiving letters, including: concerns over confidentiality (7, 17), potential patient distress with letter content (7), associated financial costs to the NHS (7, 17), issues around the comprehensibility of medical letters (16, 17, 19), and failing to acknowledge the voice of patients who do not want to receive letters (7).

Recently there have been studies, both within (20) and outside the UK (13, 18), that move beyond simply "copying" patients into correspondence and instead writing 'patient-directed letters'. In 2014, Bench et al. (20) explored the feasibility and effects of giving patients personalised discharge summaries produced by nurses. They found the summaries helped support patients and increased patient understanding. Nonetheless, barriers were identified for implementing this intervention such as 'motivation' and 'time constraints' (20). Similarly, in 2016, Buurman et al. (18) looked at personalised patient discharge letters. Although the practice was generally rated 'positively' by patients and physicians in their research, they reported medical interns felt 'explaining medical terms in understandable plain language was a difficult task' and one which incurred a feeling of 'great responsibility' and insecurity (18).

1  
2  
3 In summary, whether or not it *is* beneficial for patients to receive written discharge  
4 communication, and, if so, *for whom, when, how, why*, and whether this should be a direct  
5 copy or personalised letter remains equivocal. We could find no review specific to this  
6 question; we only found reviews of copying letters in general, for example, Minhas (8) and  
7 Harris and Boaden (12). We therefore concluded that formal consolidation of the evidence is  
8 required.  
9

### 10 **Realist Review Methodology**

11 A realist review may be defined as a, 'theory-driven, interpretative approach to the  
12 synthesis of evidence' (21). The evidence synthesised may be qualitative, quantitative or  
13 mixed methods (22). In line with taking a theory-driven approach, one of the main steps of a  
14 realist review, as outlined in the work of Pawson (23-25), is to develop and refine a 'middle-  
15 range' realist *programme theory* which details how an intervention or programme may be  
16 theorised to "work" as well as under what contexts, for whom, why and to what extent. Thus,  
17 this review seeks to develop a "programme theory" for patients receiving written discharge  
18 communication.  
19

20  
21 A realist review approach views "causation" as *generative*, that is, "mechanisms" may  
22 be triggered within certain "contexts" resulting in one or more "outcomes" following an event  
23 or "intervention" (24). A realist review, therefore, is valuable to inform attempts to reproduce  
24 beneficial or positive outcomes through understanding how an intervention *works* and hence  
25 under what circumstances, the mechanisms connected to beneficial outcomes may be  
26 triggered (26). Hence, within a healthcare context a realist review can aid understanding and  
27 explanation of how the intervention may improve clinical outcomes. Another value or  
28 strength of a realist review is the capacity to account for *complexity* and non-linear causal  
29 relationships; this is particularly relevant for research on the intervention of patients receiving  
30 written discharge communication (21, 23). The intervention under scrutiny is complex in  
31 several ways: the *form* of discharge communication may vary and the success of the  
32 intervention is highly context-dependent and most likely influenced by factors such as  
33 practitioner communicative competence, patient education and understanding, and attitudes  
34 of the patient and professional.  
35  
36

37 A realist review aims to *explain* how and why an intervention may be theorised to  
38 *work* (or not) (24). The notion of moving beyond effectiveness *evaluation* of an intervention  
39 and onto *explanation* of how and why an intervention *works* is one of the key distinctions  
40 between a realist review and other traditional review types such as a systematic review; it is  
41 also one of the realist review strengths in application to healthcare and social policy (23, 27).  
42 Due to the well-documented strengths of realist reviews, it is perhaps unsurprising that  
43 realist reviews are being increasingly used within healthcare contexts (e.g. (21, 22, 28-34)).  
44 Thus, a realist approach is suitable and useful for the current research.  
45  
46  
47

## 48 **METHODS AND ANALYSIS**

### 49 **Review Aim, Questions and Objectives**

50 Aim: To understand how and why the different effects are produced from patients receiving  
51 written discharge communication  
52

53 Effects may be simplified into desired/intended or 'positive' and undesired or 'negative'  
54 depending on whether the outcome is reported in the source as beneficial (e.g. increased  
55 patient understanding of condition) or detrimental (e.g. increased patient anxiety).  
56  
57  
58  
59

1  
2  
3 Research questions (RQs):

4 RQ1: What positive and negative effects have been reported on patients receiving written  
5 discharge communication?  
6

7 RQ2: What are the important contexts which determine whether the different mechanisms  
8 produce positive and negative effects, and why?  
9

10 Objectives:

- 11 1. To conduct a realist review to understand how and why the different effects  
12 arise when patients receive written discharge communications.
- 13 2. Develop a programme theory for patients receiving written discharge  
14 communication.
- 15 3. To make recommendations for best practice for patients receiving written  
16 hospital discharge communication.  
17  
18

19 Review start date: June 2017

20 Review anticipated completion: January 2018

### 21 **Study Design**

22 The review design is based on a collation of Pawson's five review stages (24), the project  
23 protocol by Ford et al. (27), and the project diagram by Wong et al. (22). The design is  
24 summarised in *Figure 1*.  
25  
26  
27

28 *Figure 1 Review design*  
29  
30  
31  
32  
33  
34  
35

### 36 **Step 1: Locate existing theories**

37 Locating existing theories on how patients receiving written discharge communication  
38 is theorised to work or not work in different contexts will be completed through a scoping  
39 search by KW. The scoping search will be based on search terms centred on the  
40 intervention under study (e.g. patient copies/ receiving letters / discharge communication).  
41 This search will include a mix of electronic published resources (MEDLINE, Web of Science)  
42 and UK healthcare websites (Department of Health, Royal College of Physicians).  
43 Documents sourced within the scoping search will be interrogated for theories relating to  
44 patients receiving discharge communication. Theories located in the scoping stage will be  
45 inspected and selected based on relevance to the review aims and RQs; we seek theories  
46 which aid *explanation* of how and why patients receiving discharge communication results in  
47 different positive effects (e.g. drug adherence) and negative effects (e.g. preventable  
48 hospital readmissions).  
49  
50

51 Any initial scoping search done to build the initial programme theory is not meant to  
52 be exhaustive but to function as a starting point for the realist review. During the review the  
53 initial programme theory is gradually developed. There are no hard and fast rules for how  
54 well developed the initial programme theory needs to be before the main searching is  
55 undertaken. Instead judgement is needed as is the need to balance the degree of  
56 comprehensiveness and practicalities. Our decision is that due to feasibility limitations, no  
57 more than 30 documents will be screened for theories in step 1.  
58  
59

60 Page 5 of 14

Any search strategies detailed in documents found from the scoping search will be used to inform step 2. “Keywords”, “Medical Subject Headings (MeSH)” and any other indexing for the documents found will also be used to inform the step 2 searching phase. From the findings of the scoping search and utilising the various content expertise of the research team, an initial “rough” programme theory will be developed, to be refined throughout the realist review process. Once the initial programme theory has been developed, step 2, the structured formal searching phase, will commence.

## Step 2: Searching

Following Sholl et al. (34), the list of search terms will be first piloted and modified using Medline by KW and an information specialist. Thereafter, the modified list of search terms will be employed and adapted as required across source types. The searching phase will entail a ‘purposive’ sampling strategy utilising an iterative approach (23). In line with a realist approach, the search strategy is intended to include a diverse range of evidence for programme theory development and refinement. The search will be information-specialist led. Search terms will be guided by “keywords”, “MeSH terms”, topic indexing and any found search strategies from documents located in Step 1. We anticipate the search strategy will need further testing and modification during the searching phase.

Electronic and manual searching will take place. Material included will be sourced from electronic databases, UK healthcare sites, grey literature searching and publications and archives of collaborating and local commissioners and policy-makers (see *Table 1*). In addition, hand-searching of bibliographies, ‘cited by’ searching, and contacting experts will also be undertaken.

*Table 1*

|    | Sources to be searched                  |
|----|-----------------------------------------|
| 1  | MEDLINE                                 |
| 2  | EMBASE                                  |
| 3  | CINAHL                                  |
| 4  | DARE                                    |
| 5  | ASSIA                                   |
| 6  | Web of Science                          |
| 7  | ZETOC                                   |
| 8  | AMED                                    |
| 9  | NHS Digital (HSCIC)                     |
| 10 | NHS Evidence (public domain only)       |
| 11 | DH                                      |
| 12 | NICE Guidelines                         |
| 13 | Cochrane database of systematic reviews |
| 14 | EPPI-CENTRE                             |
| 15 | SCOPUS                                  |
| 16 | Google Scholar                          |
| 17 | OpenGrey                                |
| 18 | GreyNet sources                         |
| 19 | ProQuest dissertations and theses       |
| 20 | General Medical Council                 |
| 21 | Royal College of Physicians             |
| 22 | Local Medical Committees (West)         |



|    |                                               |
|----|-----------------------------------------------|
|    | Midlands)                                     |
| 23 | Clinical Commissioning Groups (West Midlands) |
| 24 | SIGN                                          |

The search strategy is not intended to be fully comprehensive or exhaustive, but should provide a large enough overview of the literature and sources to be meaningful and develop and refine the programme theory (23).

### Step 3: Document selection

Documents will primarily be selected on their *relevance*; they must contain data that inform the programme theory (23, 24, 35). Crucially, as explained by Brennan et al. (21), this does not mean the entirety of the document must inform the programme theory but that the selection process will ‘consider small sections of the primary study to test a very specific hypothesis about the relationships between context, mechanism and outcomes’. Assessing the relevance of documents in the selection phase will be discussed and decided among the research team. Hence, selection of documents will be grounded in whether they provide knowledge to the theory of how patients receiving discharge communication works.

Reference manager software will be used to export citations of search results. Search results will be screened and selected firstly by title, secondly by abstract and finally by the full text. Data screening and selection will be undertaken by KW with another member of the review team, who will assume the role of second reviewer. KW will screen the full set of search results. The second reviewer will screen a selection of 10% to check for consistency; we have chosen this proportion following the review by Wong et al. (22). Reasons for all exclusions will be recorded by all reviewers. A kappa measure will be calculated and inter-reviewer disagreement ( $K < .8$ ) will result in the second reviewer screening the remaining respective 90%. Thereafter, the reviewers will discuss their selections until document inclusion consensus is reached for the phase. This process will take place for each of the screening and selection phases: titles, abstracts and full texts. The wider research team will adjudicate contested document selections if necessary.

The preliminary inclusion and exclusion criteria below will be applied by reviewers to all sources. As with all other steps in the realist review, screening and document selection will be viewed as an iterative process and so inclusion and exclusion criteria may change and develop (28). The review intends to source quantitative, qualitative and mixed methods evidence. For the purposes of this review, the intervention ‘patients receiving written discharge communication’ will be defined as the patient being given or sent any form of written paper or hard-copy hospital discharge communication or such communication being made available digitally; this may be a direct copy (cc:[PATIENT]), a patient-directed letter, or a combination of the two.

Inclusion criteria:

- Meet “relevance” criteria (23, 24)
- Patients discharged from hospital setting (inpatients and outpatients) to GP or family physician or community physician care
- Discharge where written correspondence, ‘discharge communication’ is sent to GP OR GP and patient
- Document/journal article/source written in English

Exclusion criteria:



- Discharge communications to units or physicians other than GPs or family or community physicians e.g. another hospital,
- Discharge of patients with conditions who lack cognitive capacity e.g. dementia, as their communicative needs are specialised
- Discharge where no written communication took place e.g. telephone only
- Patients <18 years
- Discharge letters or summaries which are not in English or where the document details the patient required assistance reading their letter e.g. translation by a relative

The preliminary criteria have been developed in order that the resultant programme theory may encompass a variety of discharge types and be relevant across hospitals and specialities for a range of patients. However, the exclusion criteria inflicts limitations on the review. The first exclusion criterion states patient discharge communication to those other than GPs or family or community physicians will be excluded. This is because the review specifically focusses on discharge communication to GPs and patients rather than referrals or care-handovers. Furthermore, the review aims to develop a theory for patients receiving discharge communication and inclusion of hospital-hospital discharge may reduce clarity and produce a less focussed theory. Patients who may have particularly specialised communicative needs (e.g. children) or where the intervention may have a higher risk of causing harm (e.g. psychiatric discharge documents, dementia discharge documents) have been excluded; the communication needs of these patients may be more complex and variable within and between different patient groups and therefore is not possible within the review scope.

International evidence which meets the criteria will be considered. Consequently, data extraction and synthesis will carefully examine documents according to their geographical and healthcare system context.

The document selection process will be recorded with an adapted PRISMA flow diagram to provide a clear audit trail (36).

#### **Step 4: Data extraction**

Data extraction of the selected documents will be undertaken by KW and the reviewer. Realist review methodology primarily achieves data extraction through annotation and note-taking methods rather than finite or fixed data extraction forms (21, 23, 34). Comparably to Mills et al. (37) and Wiese et al. (38), we propose a hybrid approach to data extraction; characteristics of the documents will be recorded in a data extraction form in Excel and annotation of the full texts for programme theory ideas and subsequent labelling will be undertaken manually. The hybrid approach is useful in providing descriptive information for grouping documents during synthesis whilst still grounding data extraction in commonly used realist note-taking techniques (23, 24).

The data extraction form will record: basic information (authors, year of publication, ID or reference, source type, and where and/or how the document was sourced), document context (geographical location, healthcare system details), document details (aims, design, methods, setting, findings and conclusion), intervention details (type of intervention or programme e.g. direct patient copy of discharge letter, number of participants, clinical speciality, participant details, form of discharge communication (e.g. discharge summary), who was involved in intervention process). We anticipate not all of the above details will be recordable for each document; we aim to record pertinent document characteristics. Data extraction forms will first be piloted and refined as needed. Completed data extraction forms

1  
2  
3 will be discussed and checked with the research team for accuracy; adjustments to the form  
4 may be made.

5  
6 The annotation phase and note-taking methods will be guided by the rough  
7 programme theory developed in step 1; we will test and refine the theory using data from  
8 included documents (37). The two members of the research team will manually review,  
9 examine, highlight and annotate the documents in relation to CMO (Context Mechanism  
10 Outcome) information and any theories about how the intervention does or does not work. In  
11 line with the work of Pawson et al. (23), documents will be 'scrutinised for which programme  
12 idea they address' and labelled. Annotations will be consolidated and discussed amongst the  
13 three annotators and wider research team.

14  
15 During the data extraction phase, documents will also be quality appraised for  
16 Pawson's concept of *rigour* (23). Brennan et al. (21) describe *rigour* as 'whether the methods  
17 used to generate the relevant data are credible and trustworthy'. Rigour will be assessed in  
18 accordance with 'Realist and Meta-Review Evidence Synthesis: Evolving Standards'  
19 (RAMESES) guidelines and standards (39, 40). It is important to note that although we will  
20 assess "rigour", Pawson et al. (23) advise against exclusion of an entire document *solely*  
21 based on rigour; they argue this could, 'reduce rather than increase the validity and  
22 generalisability of review findings' as different parts of different documents contribute to the  
23 evidence base for programme theory testing and refinement. Hence, we will only make  
24 judgement about the rigour of data that we have assessed to be relevant for programme  
25 theory development and testing (23).

### 26 27 28 **Step 5: Data synthesis**

29  
30 Data and analysis from step 4 will be consolidated and synthesised to refine the  
31 programme theory by KW and the wider research team. A realist analytic approach will be  
32 used to interrogate the theory, according to Pawson et al. (24), and assess, according to the  
33 data, what "works", why, for whom, to what extent and in what circumstances. Specifically,  
34 during data synthesis, we will look at evidence of the different outcomes within the initial  
35 programme theory and infer how these are caused in certain contexts through triggering  
36 different mechanisms (21, 23). We will be using the framework for synthesising evidence  
37 termed by Pawson et al. (23) as "synthesis to consider the same theory in comparative  
38 settings". They explain, "this approach to synthesis assumes that particular programme  
39 theories work in some settings and not others and aims to make sense of the patterns of  
40 winners and losers.' We assume that the theory of patients receiving discharge  
41 communication does work in particular settings in particular forms but not in others and  
42 therefore that there may be different effects this intervention has depending on context.  
43 Hence, this approach is advantageous through comparing the intervention in the various  
44 settings found within the included documents. Our "hybrid" approach to data extraction will  
45 aid the comparative process through permitting rapid 'groupings' of intervention settings  
46 alongside the programme theory annotations and labelling from step 4.

47  
48  
49 Relevant data from each document will be systematically considered to test and refine  
50 the programme theory using the following analytical strategies (21, 38, 39):

- 51
- 52 • Juxtaposition of data sources – align sources and use evidence of each to build upon  
53 and clarify each other
- 54 • Reconciliation of data discrepancies – examine and explore reasons for apparent  
55 disparities between data
- 56 • Adjudication of data - quality consideration on the foundation of methodological  
57 strengths and weaknesses
- 58
- 59

- Consolidation of data - inference of Mechanisms for outcomes
- Situation of evidence - consideration of details of settings in order to complete “context” element of CMOs and explain differing outcomes of intervention

To address the research questions, we will cross-tabulate and compare the CMOs in order to highlight patterns of the important contexts for positive and negative effects and any reported benefits of the intervention. CMOs will be consolidated through the process of cross-tabulation and subsequently integrated into the programme theory.

The research team is made up of healthcare researchers, practising healthcare professionals, social scientists and medical students; this range of expertise is expected to facilitate and promote rigorous analysis and synthesis of data.

### **Step 6: Refine programme theory**

The final stage is the refinement and testing of the programme theory in light of the synthesised data (23). Stakeholder perspectives will assist refinement of the final theory through providing ‘content expertise’ (22). Brennan et al. (21) describe stakeholder contributions as a ‘reality check’ to test whether the programme theory derived from the published literature aligns with stakeholder experiences in practice. Stakeholders will primarily be engaged through the project collaborating Clinical Commissioning Groups (CCGs for South Warwickshire and Coventry & Rugby) and West Midlands Clinical Research Network. We will limit stakeholder involvement to three different groups: policy and decision-makers, practitioners and service users. These will be included due to their differing perspectives on the discharge communication process.

We aim to hold three discussion groups; one for each stakeholder-type. KW will lead the discussion sessions with a research assistant. During these sessions, stakeholders will be able to view the results and analyses of the review with the opportunity to influence interpretation of findings and refine analyses; the sessions will particularly focus on discussing and refining the programme theory. It is pertinent to consult stakeholders to increase the relevance and practicability of the review recommendations for informing best practice. Formal ethical approval will not be required but informed participation will be sought

After completion of step 6, any or all of the review steps may be revisited as necessary to refine the programme theory and attain “theoretical saturation”. The threshold for “theoretical saturation” will be decided according to Pawson’s ‘test of saturation’ (24, 35). Consequently, after each cycle of review steps, the research team will determine whether the latest cycle has provided additional information about the intervention to answer the research questions and test the programme theory (28). As such, the stopping point for the review will be determined when ‘theoretical saturation’ is reached; when the addition of documents and repetition of steps is not adding further knowledge (24).

A diagram will be used to present the final programme theory alongside a narrative summary. The review will be reported according to RAMESES standards (39, 40).

## **ETHICS AND DISSEMINATION**

### **Ethics**

Formal ethical approval is not required for this review.

### **Dissemination**

The final theory will contribute towards explanation of what works in relation to patients receiving discharge communication. The findings will provide valuable insight into

1  
2  
3 how and why this intervention produces its different effects which will support improved  
4 practice guidelines and policy. Informing best practice is of benefit to multiple stakeholders  
5 involved in sending and receiving discharge communication and development and regulation  
6 of this intervention. The review findings will be disseminated in a peer-reviewed journal,  
7 conference presentations and discussions with policymakers, educationalists and  
8 commissioners, and relevant organisations to ensure the findings are readily available to  
9 inform best practice of patients receiving their hospital discharge letters. While the review will  
10 be undertaken from the perspective of UK NHS, its findings should be relevant to other  
11 healthcare systems in which there are well-developed primary care services.  
12

### 13 **Authors' contributions:**

14  
15 KW, ES, SS and JD conceptualised the study. KW is responsible for the design and drafting  
16 of the protocol manuscript. GW, ES, SS and JD contributed to protocol development and  
17 GW also provided methodological advice. GW, JD, ES and SS critically reviewed and edited  
18 the manuscript. All authors read and approved the final manuscript.  
19

20 **Acknowledgements:** Samantha Johnson, our information specialist, for critically appraising  
21 the search strategy.  
22

23 **Funding statement:** This work is supported by the Economic and Social Research Council  
24 (ESRC) grant number ES/J500203/1 and Clinical Commissioning Groups (CCGs) of  
25 Coventry & Rugby and South Warwickshire. Funding for the open access charges for  
26 publication of this protocol was provided by the RCUK fund.  
27

28 **Competing interests:** None known  
29

### 30 **References**

- 31  
32 1. NHS England. Standards for the communication of patient diagnostic test results on  
33 discharge from hospital. [Online].; 2016. HYPERLINK  
34 "http://www.england.nhs.uk/patientsafety/wp-content/uploads/sites/32/2016/09/discharge-  
35 standards-march-16.pdf" [http://www.england.nhs.uk/patientsafety/wp-](http://www.england.nhs.uk/patientsafety/wp-content/uploads/sites/32/2016/09/discharge-standards-march-16.pdf)  
36 [content/uploads/sites/32/2016/09/discharge-standards-march-16.pdf](http://www.england.nhs.uk/patientsafety/wp-content/uploads/sites/32/2016/09/discharge-standards-march-16.pdf) . (accessed  
37 January 2017)  
38  
39 2. Department of Health. Copying letters to patients: good practice guidelines.; 2003.  
40 HYPERLINK "http://webarchive.nationalarchives.gov.uk/"  
41 <http://webarchive.nationalarchives.gov.uk/> . (accessed 9 May 2017)  
42  
43 3. Department of Health. The NHS Plan.; 2000. HYPERLINK  
44 "http://webarchive.nationalarchives.gov.uk" <http://webarchive.nationalarchives.gov.uk> .  
45 (accessed 2 June 2017)  
46  
47 4. White P. Copying referral letters to patients: prepare for change. Patient Educ Couns.  
48 2004; 54(2): p. 159-61.  
49  
50 5. Pothier D, Nakivell P, Hall C. What do patients think about being copied into their GP  
51 letters. Ann R Coll Surg Engl. 2007; 89(7).  
52  
53 6. O'Driscoll BR, Koch J, Paschalides C. Copying letters to patients: most patients want  
54 copies of letters from outpatient clinics and find them useful. BMJ. 2003; 327(7412):  
55 p.451.  
56  
57  
58  
59  
60

- 1  
2  
3 7. Marzanski M, Musunuri P, Coupe T. Copying letters to patients: a study of patients'  
4 views'. *The Psychiatrist*. 2005; 29(2).
- 5  
6 8. Minhas R. Does copying clinical or sharing correspondence to patients result in better  
7 care? *Int J Clin Pract*. 2007; 61(8): p. 1390-5.
- 8  
9 9. Shee C. Try it and see. *BMJ*. 2008; 337: a2786
- 10  
11 10. Thornber M. Copy them in. *BMJ*. 2010; 337(1).[rapid response]  
12 [http://www.bmj.com/rapid-response/2011/11/03/simple-and-effective-communication-](http://www.bmj.com/rapid-response/2011/11/03/simple-and-effective-communication-skill)  
13 [skill](http://www.bmj.com/rapid-response/2011/11/03/simple-and-effective-communication-skill). (accessed 31/05/2017)
- 14  
15 11. Thornber M. Copying referral letters. *Br J Gen Pract*. 2009; 59(568).
- 16  
17 12. Harris C, Boaden R. Does copying clinical or sharing correspondence to. *Journal of*  
18 *Health Services Research Policy*. 2006; 11(3): p. 133-40.
- 19  
20 13. Lin R, Gallagher R, Spinaze M, et al. Effect of a patient-directed discharge letter on  
21 patient understanding of their hospitalisation. *Intern Med J*. 2014; 44(9).
- 22  
23 14. Santana MJ, Holroyd-Leduc J, Flemons WW, et al. The seamless transfer of care: a pilot  
24 study assessing the usability of an electronic transfer of care communication tool. *Am J*  
25 *Med Qual*. 2014; 29(6).
- 26  
27 15. VanSuch M, Naessens JM, Stroebel RJ, et al. Effect of discharge instructions on  
28 readmission of hospitalised patients with heart failure: do all of the Joint Commission on  
29 Accreditation of Healthcare Organizations heart failure core measures reflect better  
30 care? *Qual Saf Health Care*. 2006; 15(6).
- 31  
32 16. Main J. Copying in or copping out? *BMJ*. 2008; 337(a2688).
- 33  
34 17. McKinstry B. Copying patients in is not as simple as it seems. *BMJ*. 2008; 337(a2324).
- 35  
36 18. Buurman BM, Verhaegh KJ, Smeulders M, et al. Improving handoff communication from  
37 hospital to home: the development, implementation and evaluation of a personalized  
38 patient discharge letter. *Int J Qual Health Care*. 2016; 28(3).
- 39  
40 19. Choudhry AJ, Baghdadi YM, Wagie AE, et al. Readability of discharge summaries: with  
41 what level of information are we dismissing our patients? *Am J Surg*. 2016; 211(3).
- 42  
43 20. Bench SD, Heelas K, White C, et al. Providing critical care patients with a personalised  
44 discharge summary: a questionnaire survey and retrospective analysis exploring  
45 feasibility and effectiveness. *Intensive Crit Care Nurs*. 2014; 30(2): p. 69-76.
- 46  
47 21. Brennan N, Bryce M, Pearson M, et al. Understanding how appraisal of doctors  
48 produces its effects: a realist review protocol. *BMJ Open*. 2014; 4(6).
- 49  
50 22. Wong G, Brennan N, Mattick K, et al. Interventions to improve antimicrobial prescribing  
51 of doctors in training: the IMPACT (IMProving Antimicrobial presCribing of doctors in  
52 Training) realist review. *BMJ Open*. 2015; 5(10).
- 53  
54 23. Pawson R, Greenhalgh T, Harvey G, et al. Realist synthesis: an introduction.: University  
55 of Manchester; 2004. HYPERLINK "<https://goo.gl/1Rz2Ry>" <https://goo.gl/1Rz2Ry> .



(accessed 4 January 2017)

24. Pawson R, Greenhalgh T, Harvey G, et al. Realist review-a new method of systematic review designed for complex policy interventions. *J Health Serv Res Policy*. 2005; 10(1): p. 21-34.
25. Pawson R. Middle Range Theory and Programme Theory Evaluation: From Provenance to Practice. In: Vaessen J, Leeuw F, eds. *Mind the Gap: perspectives on policy evaluation and the social sciences*. London: New Brunswick; 2010. p. 171-202.
26. Rycroft-Malone J, Burton C, Hall B, et al. Improving skills and care standards in the support workforce for older people: a realist review. *BMJ Open*. 2014; 4(5).
27. Ford JA, Jones AP, Wong G, et al. Improving access to high-quality primary care for socioeconomically disadvantaged older people in rural areas: a mixed method study protocol. *BMJ Open*. 2015; 5(9).
28. Kastner M, Estey E, Perrier L, et al. Understanding the relationship between the perceived characteristics of clinical practice guidelines and their uptake: protocol for a realist review. *Implement Sci*. 2011; 6(1): p. 69.
29. Pearson M, Chilton R, Woods H, et al. Implementing health promotion programmes in schools: a realist systematic review of research and experience in the United Kingdom. *Implement Sci*. 2015; 10(149).
30. Greenhalgh J, Gooding K, Gibbons E, et al. For whom and in what circumstances does the use of patient reported outcome measures (PROMs) improve patient care? A realist synthesis. *J Epidemiol Community Health*. 2016; 70(1).
31. Wong G. The Internet in Medical Education: A Worked Example of a Realist Review. In Hannes K, Lockwood C, editors. *Synthesizing Qualitative Research: Choosing the Right Approach*.; 2012. p. 83-112.
32. Harris J, Graue M, Dunning T, et al. Involving people with diabetes in the wider community in diabetes research: a realist review protocol. *Systematic Reviews*. 2015; 4(146).
33. Husk K, Blockley K, Lovell R, et al. What approaches to social prescribing work, for whom, and in what circumstances? A protocol for a realist review. *Syst Rev*. 2016; 5(93).
34. Sholl S, Ajjawi R, Allbutt H, et al. Balancing student/trainee learning with the delivery of patient care in the healthcare workplace: a protocol for realist synthesis. *BMJ Open*. 2016; 6(4).
35. Pawson R. Digging for Nuggets: How 'Bad' Research Can Yield 'Good' Evidence - in - International Journal of Social Research Methodology. *Int J Soc Res Methodol*. 2006; 9(2): p. 127-42.
36. Moher D, Liberati A, Tetzlaff J, et al. Preferred reporting items for systematic reviews and meta-analyses: the PRISMA statement. *BMJ*. 2009; 339(b2535).
37. Mills SL, Pumarino J, Clark N, et al. Understanding how self-management interventions

1  
2  
3 work for disadvantaged populations living with chronic conditions: protocol for a realist  
4 synthesis. *BMJ Open*. 2014; 4(7): p. e005822.  
5

6 38. Wiese A, Kilty C, Bergin C, et al. Protocol for a realist review of workplace learning in  
7 postgraduate medical education and training. *Syst Rev*. 2017; 6(10).  
8

9 39. RAMESES. [Online].; 2013. HYPERLINK "<http://www.ramesesproject.org/>"  
10 <http://www.ramesesproject.org/> . (accessed 9 January 2017)  
11

12 40. Wong G, Greenhalgh T, Westhorp G, et al. RAMESES publication standards: realist  
13 syntheses. *BMC Med*. 2013 January; 11(21).  
14  
15  
16  
17  
18  
19  
20  
21  
22  
23  
24  
25  
26  
27  
28  
29  
30  
31  
32  
33  
34  
35  
36  
37  
38  
39  
40  
41  
42  
43  
44  
45  
46  
47  
48  
49  
50  
51  
52  
53  
54  
55  
56  
57  
58  
59  
60

1  
2  
3  
4  
5  
6  
7  
8  
9  
10  
11  
12  
13  
14  
15  
16  
17  
18  
19  
20  
21  
22  
23  
24  
25  
26  
27  
28  
29  
30  
31  
32  
33  
34  
35  
36  
37  
38  
39  
40  
41  
42  
43  
44  
45  
46  
47  
48  
49  
50  
51  
52  
53  
54  
55  
56  
57  
58  
59  
60

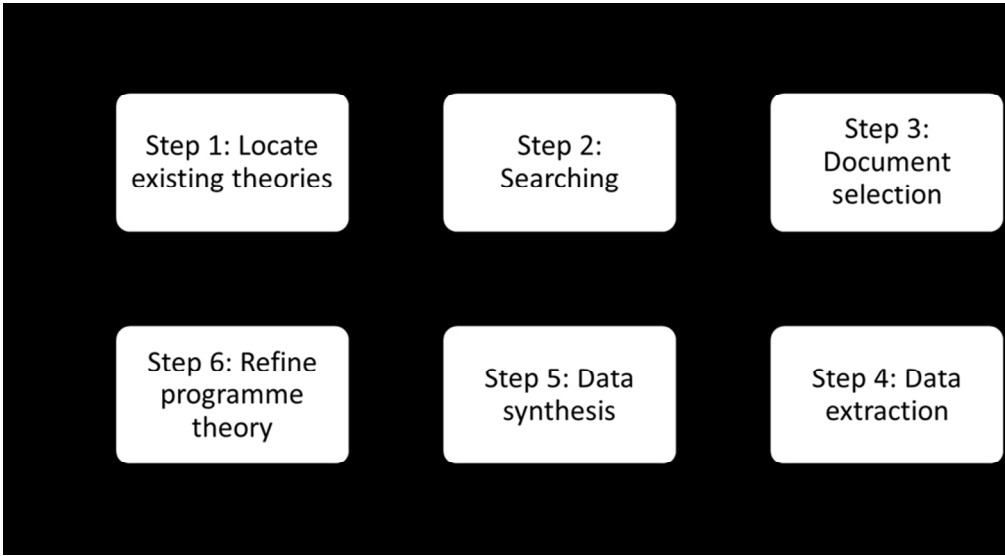

Figure 1

86x47mm (300 x 300 DPI)

review only
